# Supplementary material for: Fabrication of robust superhydrophobic surfaces by modification of chemically roughened fibers via thiol–ene click chemistry
Source: Royal Society of Chemistry journal article supplement (doi:10.1039/c5ta04802h), 2015-01-01
Supplement: c5ta04802h1.pdf [file c5ta04802h1.pdf]

Electronic Supplementary Material (ESI) for Journal of Materials Chemistry A  
This journal is © The Royal Society of Chemistry 2015

## **Electronic Supplementary Information**

### **Robust Superhydrophobic Surfaces by Modification of Chemically Roughened Fibers via Thiol-Ene Click Chemistry**

Chao-Hua Xue,<sup>\*a,b</sup> Xiao-Jing Guo,<sup>b</sup> Ming-ming Zhang,<sup>b</sup> Jian-Zhong Ma,<sup>b</sup> and Shun-Tian Jia<sup>b</sup>

<sup>a</sup> College of Resource and Environment, Shaanxi University of Science and  
Technology, Xi'an 710021, China

<sup>b</sup> Shaanxi Research Institute of Agricultural Products Processing Technology, Shaanxi  
University of Science and Technology, Xi'an 710021, China.

E-mail: xuech@zju.edu.cn

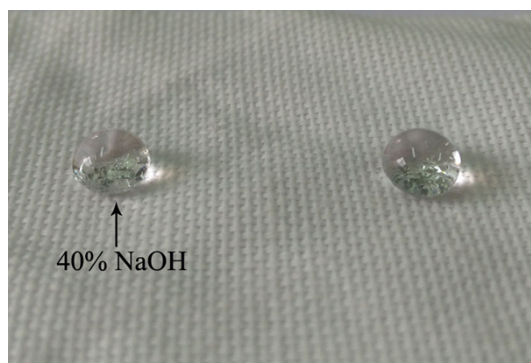

Figure S1 Photograph of 40% NaOH droplet on E-PET-S-F fabric.

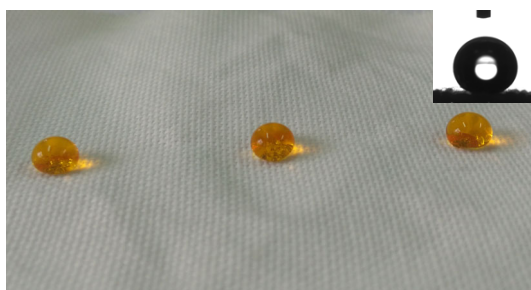

Figure S2 Photograph of dyed water on E-PET-S-F fabric after alkali etching.

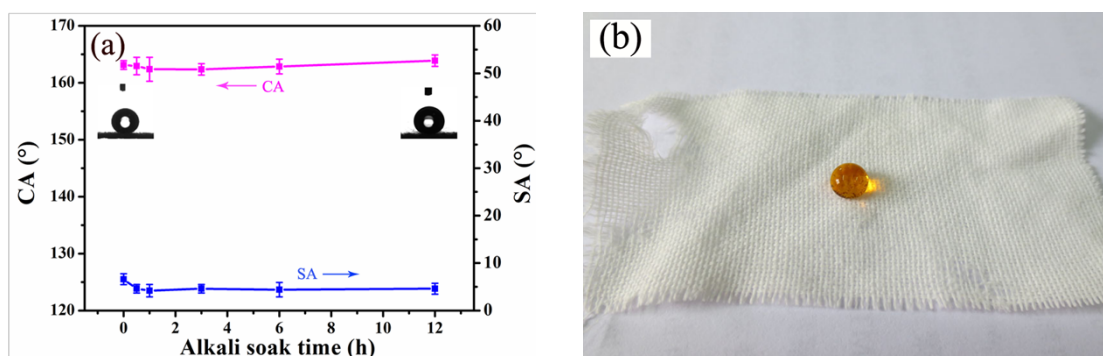

Figure S3. (a) CA and SA changes of superhydrophobic E-PET-S-F fabrics with soaking time in 40% alkali solution, (b) Photograph of dyed water droplets on E-PET-S-F fabrics after 12 h immersion in 40% alkali solution.
