# Supplementary material for: Fabrication of robust superhydrophobic surfaces by modification of chemically roughened fibers via thiol–ene click chemistry
Source: Royal Society of Chemistry journal article supplement (doi:10.1039/c5ta04802h), 2015-01-01

Superhydrophobic fabrics were fabricated by alkali etching of fibers, modification with mercapto silanes and hydrophobization via thiol-ene click chemistry.

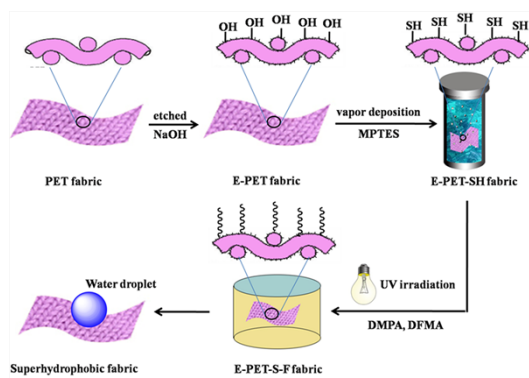

Supplement: c5ta04802h2.pdf [file c5ta04802h2.pdf]
